# Supplementary material for: Structured Reporting of Computed Tomography and Magnetic Resonance in the Staging of Pancreatic Adenocarcinoma: A Delphi Consensus Proposal
Source: MDPI journal article supplement (doi:10.3390/diagnostics11112033), 2021-11-03
Supplement: s1 [file s1]

## Section S1

### PATIENT CLINICAL DATA (*imported from RIS*)

| FIELD                                                                             | DETAIL                                                                              | ADMITTED VALUES                                                                                    |
|-----------------------------------------------------------------------------------|-------------------------------------------------------------------------------------|----------------------------------------------------------------------------------------------------|
| ANTHROPOMETRIC DATA                                                               |                                                                                     |                                                                                                    |
| Weight                                                                            | (kg) [Numeric]                                                                      |                                                                                                    |
| Height                                                                            | (cm) [Numeric]                                                                      |                                                                                                    |
| BMI                                                                               | [Numeric] (automatically calculated)                                                |                                                                                                    |
| BSA                                                                               | [Numeric] (automatically calculated)                                                |                                                                                                    |
| Age                                                                               | (years) [Numeric]                                                                   |                                                                                                    |
| Age range<br><br>(filled in automatically)                                        | <ul style="list-style-type: none"><li>&lt; 50 years</li><li>&gt; 50 years</li></ul> |                                                                                                    |
| PATIENT HISTORY                                                                   |                                                                                     |                                                                                                    |
| Family history of pancreatic cancer<br><br>(visible only if “Yes” and repeatable) | Yes/No                                                                              |                                                                                                    |
|                                                                                   | Degree of kinship                                                                   | <ul style="list-style-type: none"><li>Mother</li><li>Father</li><li>Brother(s)/sister(s)</li></ul> |

|                                                                 |        |                                                                                                                                                                                                                                         |
|-----------------------------------------------------------------|--------|-----------------------------------------------------------------------------------------------------------------------------------------------------------------------------------------------------------------------------------------|
|                                                                 |        | <ul style="list-style-type: none"> <li>• Maternal grandparent(s)</li> <li>• Paternal grandparent(s)</li> <li>• Uncle(s)/aunt(s)</li> <li>• Other <i>[Free text]</i></li> </ul>                                                          |
|                                                                 | Notes  | <i>[Free text]</i>                                                                                                                                                                                                                      |
| Personal history of other cancers                               | Yes/No |                                                                                                                                                                                                                                         |
|                                                                 | Notes  | <i>[Free text]</i>                                                                                                                                                                                                                      |
| Predisposing diseases<br>(visible only if “Yes” and repeatable) | Yes/No |                                                                                                                                                                                                                                         |
|                                                                 | Type   | <ul style="list-style-type: none"> <li>• Obesity</li> <li>• Diabetes mellitus</li> <li>• Chronic pancreatitis</li> <li>• Prior gastrectomy</li> </ul>                                                                                   |
|                                                                 | Notes  | <i>[Free text]</i>                                                                                                                                                                                                                      |
| Hereditary syndromes<br>(visible only if “Yes” and repeatable)  | Type   | <ul style="list-style-type: none"> <li>• Peutz-Jeghers syndrome</li> <li>• familial atypical multiple mole melanoma (FAMMM) syndrome</li> <li>• hereditary pancreatitis</li> <li>• autoimmune syndromes (pancreatitis, etc.)</li> </ul> |

|                                        |                                                 |                                                                                                                                                                                                                                 |                                                                                             |
|----------------------------------------|-------------------------------------------------|---------------------------------------------------------------------------------------------------------------------------------------------------------------------------------------------------------------------------------|---------------------------------------------------------------------------------------------|
|                                        |                                                 | <ul style="list-style-type: none"> <li>• Lynch syndrome</li> <li>• hereditary nonpolyposis colorectal cancer (HNPCC)</li> <li>• familial breast cancer</li> <li>• ataxia-telangiectasia</li> <li>• other [Free text]</li> </ul> |                                                                                             |
| Other genetic mutations                | Yes/No                                          | <ul style="list-style-type: none"> <li>• BRCA-2</li> <li>• other [Free text]</li> </ul>                                                                                                                                         |                                                                                             |
| Lifestyle/dietary habits               | Smoke                                           | Yes/No                                                                                                                                                                                                                          |                                                                                             |
| (visible only if "Yes" and repeatable) | SMOKING DETAILS (visible only if Smoke = "Yes") |                                                                                                                                                                                                                                 |                                                                                             |
|                                        |                                                 | Smoker                                                                                                                                                                                                                          | <ul style="list-style-type: none"> <li>• Current smoker</li> <li>• Former smoker</li> </ul> |
|                                        |                                                 | Cigarette smoke                                                                                                                                                                                                                 | Yes/No                                                                                      |
|                                        |                                                 | Number of daily cigarettes (if "Current smoker")                                                                                                                                                                                | [Numeric]                                                                                   |
|                                        |                                                 | Smoking years                                                                                                                                                                                                                   | [Numeric]                                                                                   |
|                                        |                                                 | Years from cessation (if "Former smoker")                                                                                                                                                                                       | <ul style="list-style-type: none"> <li>• ≤15</li> <li>• &gt;15</li> </ul>                   |

|  |                        |                                                                             |                                                                                                 |
|--|------------------------|-----------------------------------------------------------------------------|-------------------------------------------------------------------------------------------------|
|  |                        | Cigarettes per year (pack-year)<br>(if “Former smoker” or “Current smoker”) | [Numeric] (automatically calculated)*<br><br>*(Number of daily cigarettes x smoking years / 20) |
|  |                        | Vaping                                                                      | Yes/No                                                                                          |
|  |                        | Number of daily electronic cigarettes refills<br>(if vaping = “Yes”)        | [Numeric]                                                                                       |
|  |                        | Number of years<br>(if vaping = “Yes”)                                      | [Numeric]                                                                                       |
|  |                        | Notes                                                                       | [Free text]                                                                                     |
|  | High alcohol intake    | Yes (more than 1 glass/day for women and 2 glasses/day for men)             |                                                                                                 |
|  |                        | No                                                                          |                                                                                                 |
|  | High meat intake       | Yes (white or red meat intake more than 3 times/week)                       |                                                                                                 |
|  |                        | No                                                                          |                                                                                                 |
|  | High cured meat intake | Yes (cured meat intake more than once a week)                               |                                                                                                 |
|  |                        | No                                                                          |                                                                                                 |
|  | Low vegetable intake   | Yes (less than 2 servings/day)                                              |                                                                                                 |
|  |                        | No                                                                          |                                                                                                 |

|                                        |                                                                            |                                                                                                                                                                  |
|----------------------------------------|----------------------------------------------------------------------------|------------------------------------------------------------------------------------------------------------------------------------------------------------------|
|                                        | Low fruit intake                                                           | Yes (less than 3 whole fruits/day)                                                                                                                               |
|                                        |                                                                            | No                                                                                                                                                               |
|                                        | Notes                                                                      | [Free text]                                                                                                                                                      |
| ALLERGIES AND ADVERSE REACTIONS        |                                                                            |                                                                                                                                                                  |
| Reported allergies                     | Yes/No                                                                     |                                                                                                                                                                  |
| (visible only if “Yes” and repeatable) | Type                                                                       | <ul style="list-style-type: none"> <li>• Drug-related (n of drugs)</li> <li>• Contrast medium-related (n of contrast media)</li> <li>• Drug-unrelated</li> </ul> |
|                                        | Active principle/molecule<br>[if drug- or contrast medium-related allergy] | [Free text]                                                                                                                                                      |
|                                        | Commercial name<br>[if drug- or contrast medium-related allergy]           | [Free text]                                                                                                                                                      |
|                                        | Notes                                                                      | [Free text]                                                                                                                                                      |
|                                        |                                                                            |                                                                                                                                                                  |
| PREVIOUS adverse reactions             | Yes/No                                                                     |                                                                                                                                                                  |
| (visible only if “Yes” and repeatable) | Date                                                                       | month/year [mm/yyyy]                                                                                                                                             |
|                                        | Type                                                                       | <ul style="list-style-type: none"> <li>• Contrast medium-related / unrelated</li> </ul>                                                                          |

|                            |                                  |                                                                                                                                                                                                                    |
|----------------------------|----------------------------------|--------------------------------------------------------------------------------------------------------------------------------------------------------------------------------------------------------------------|
|                            | Degree                           | <ul style="list-style-type: none"> <li>• Mild</li> <li>• Moderate</li> <li>• Severe</li> </ul>                                                                                                                     |
|                            | Time of onset                    | <ul style="list-style-type: none"> <li>• Early</li> <li>• Late</li> </ul>                                                                                                                                          |
|                            | Notes                            | [Free text]                                                                                                                                                                                                        |
| Antiallergic premedication | Yes/No                           |                                                                                                                                                                                                                    |
|                            | Treatment                        | <ul style="list-style-type: none"> <li>• Steroid</li> <li>• Antihistamine</li> </ul>                                                                                                                               |
|                            | Complete                         | Yes/No                                                                                                                                                                                                             |
|                            | Notes                            | [Free text]                                                                                                                                                                                                        |
| Nephroprotective protocol  | Yes/No                           |                                                                                                                                                                                                                    |
|                            | Complete                         | Yes/No                                                                                                                                                                                                             |
|                            | Serum creatinine                 | [Numeric] (mg/dl)                                                                                                                                                                                                  |
|                            | GFR (Glomerular Filtration Rate) | [Numeric] (ml/min)<br><br><a href="https://www.merckmanuals.com/medical-calculators/GFR_CKD_EPI-it.htm">https://www.merckmanuals.com/medical-calculators/GFR_CKD_EPI-it.htm</a> (sex, race, age, serum creatinine) |

|  |       |             |
|--|-------|-------------|
|  | Notes | [Free text] |
|--|-------|-------------|

## CLINICAL EVALUATION

| FIELD                                                         | DETAIL                                                 | ADMITTED VALUES                                                                                                                                                                                                                                                                      |
|---------------------------------------------------------------|--------------------------------------------------------|--------------------------------------------------------------------------------------------------------------------------------------------------------------------------------------------------------------------------------------------------------------------------------------|
| CLINICAL INFORMATION                                          | Yes/No                                                 |                                                                                                                                                                                                                                                                                      |
| Prior imaging tests<br>(visible only if “Yes” and repeatable) | Type                                                   | <ul style="list-style-type: none"> <li>• Gastroscopy</li> <li>• Endoscopic ultrasonography</li> <li>• CT</li> <li>• MRI</li> <li>• Ultrasonography</li> <li>• CEUS</li> <li>• <sup>18</sup>F-FDG PET-CT</li> <li>• <sup>68</sup>Ga-SA PET-CT</li> <li>• Other [Free text]</li> </ul> |
|                                                               | Date                                                   | [dd/mm/yyyy]                                                                                                                                                                                                                                                                         |
|                                                               | Notes                                                  | [Free text]                                                                                                                                                                                                                                                                          |
| Histopathological examination on biopsy specimen              | Yes/No                                                 |                                                                                                                                                                                                                                                                                      |
| Histologic grade                                              | <ul style="list-style-type: none"> <li>• Gx</li> </ul> |                                                                                                                                                                                                                                                                                      |

|                 |                                                                                                                                                                                                                                                                                                                                                                                                                                                                                                                                                                                                                                                                                                                                                                       |
|-----------------|-----------------------------------------------------------------------------------------------------------------------------------------------------------------------------------------------------------------------------------------------------------------------------------------------------------------------------------------------------------------------------------------------------------------------------------------------------------------------------------------------------------------------------------------------------------------------------------------------------------------------------------------------------------------------------------------------------------------------------------------------------------------------|
|                 | <ul style="list-style-type: none"><li>• G1</li><li>• G2</li><li>• G3</li></ul>                                                                                                                                                                                                                                                                                                                                                                                                                                                                                                                                                                                                                                                                                        |
| Histologic type | <ul style="list-style-type: none"><li>• Ductal adenocarcinoma</li><li>• Adenosquamous carcinoma</li><li>• Hepatoid carcinoma</li><li>• Medullary carcinoma</li><li>• Mucinous noncystic carcinoma (colloid carcinoma)</li><li>• Signet ring cell carcinoma</li><li>• Undifferentiated carcinoma</li><li>• Undifferentiated carcinoma with osteoclast-like giant cells</li><li>• Acinar cell carcinoma</li><li>• Acinar cell cystadenocarcinoma</li><li>• Intraductal papillary mucinous neoplasm with associated invasive carcinoma</li><li>• Intraductal tubulopapillary neoplasm with associated invasive carcinoma</li><li>• Mucinous cystic neoplasm with associated invasive carcinoma</li><li>• Pancreatoblastoma</li><li>• Serous cystadenocarcinoma</li></ul> |



|                  |                                                                                                                                                                                                                                                                                                                                                                                                                         |                                                                                                                                                                  |
|------------------|-------------------------------------------------------------------------------------------------------------------------------------------------------------------------------------------------------------------------------------------------------------------------------------------------------------------------------------------------------------------------------------------------------------------------|------------------------------------------------------------------------------------------------------------------------------------------------------------------|
|                  | <ul style="list-style-type: none"> <li>• Solid pseudopapillary neoplasm</li> <li>• Neuroendocrine carcinoma</li> <li>• Small cell neuroendocrine carcinoma</li> <li>• Large cell neuroendocrine carcinoma</li> <li>• Mixed acinar ductal carcinoma</li> <li>• Mixed acinar neuroendocrine carcinoma</li> <li>• Mixed acinar neuroendocrine ductal carcinoma</li> <li>• Mixed neuroendocrine ductal carcinoma</li> </ul> |                                                                                                                                                                  |
| Ca19.9 level     | [Numeric]                                                                                                                                                                                                                                                                                                                                                                                                               |                                                                                                                                                                  |
| CEA level        | [Numeric]                                                                                                                                                                                                                                                                                                                                                                                                               |                                                                                                                                                                  |
| Blood count      | [Numeric]                                                                                                                                                                                                                                                                                                                                                                                                               |                                                                                                                                                                  |
| Serum creatinine | [Numeric]                                                                                                                                                                                                                                                                                                                                                                                                               |                                                                                                                                                                  |
| Liver function   | <ul style="list-style-type: none"> <li>• Normal</li> <li>• Impaired</li> </ul>                                                                                                                                                                                                                                                                                                                                          |                                                                                                                                                                  |
| Symptoms         | Yes/No                                                                                                                                                                                                                                                                                                                                                                                                                  | If yes: <ul style="list-style-type: none"> <li>• pain (yes/no)</li> <li>• jaundice (yes/no)</li> <li>• diarrhea (yes/no)</li> <li>• other [Free text]</li> </ul> |

## IMAGING PROTOCOL

| FIELD                   | DETAIL                                                      | ADMITTED VALUES                                                                                                                                                                                                                                                                            |
|-------------------------|-------------------------------------------------------------|--------------------------------------------------------------------------------------------------------------------------------------------------------------------------------------------------------------------------------------------------------------------------------------------|
| IMAGING DATA            |                                                             |                                                                                                                                                                                                                                                                                            |
| Date of examination     | Date <i>[dd/mm/yyyy]</i>                                    |                                                                                                                                                                                                                                                                                            |
| Clinical indication     | Primary staging                                             |                                                                                                                                                                                                                                                                                            |
| Scanner brand and model | <i>[Free text]</i>                                          |                                                                                                                                                                                                                                                                                            |
| CT protocol             | Number of detector rows                                     | <i>[Numeric]</i>                                                                                                                                                                                                                                                                           |
|                         | Precontrast scan<br><i>(*details visible only if "Yes")</i> | *Yes/No<br><br>Dual energy (Yes/No)<br><br>Slice thickness (mm) <i>[Numeric]</i><br><br>Convolution kernel(s) <i>[Free text]</i><br><br>Body area <i>[multiple choice]</i> : <ul style="list-style-type: none"> <li>• abdomen</li> <li>• chest</li> <li>• neck</li> <li>• brain</li> </ul> |
|                         | Post-contrast scan                                          | <i>*[Numeric]</i>                                                                                                                                                                                                                                                                          |

|                         |                                                   |                                                                                                                                                                                                                                                                                                                                                                                                                |
|-------------------------|---------------------------------------------------|----------------------------------------------------------------------------------------------------------------------------------------------------------------------------------------------------------------------------------------------------------------------------------------------------------------------------------------------------------------------------------------------------------------|
|                         | (*details repeatable for each post-contrast scan) | Post-contrast phase(s) [multiple choice]: <ul style="list-style-type: none"> <li>• early arterial</li> <li>• pancreatic</li> <li>• venous</li> <li>• late</li> </ul> Dual energy (Yes/No)<br>Slice thickness (mm) [Numeric]<br>Convolution kernel(s) [Free text]<br>Body area [multiple choice]: <ul style="list-style-type: none"> <li>• abdomen</li> <li>• chest</li> <li>• neck</li> <li>• brain</li> </ul> |
| Radiation exposure      | Class of radiation exposure                       | [Numeric]                                                                                                                                                                                                                                                                                                                                                                                                      |
| CONTRAST MEDIUM         |                                                   |                                                                                                                                                                                                                                                                                                                                                                                                                |
| Use of contrast medium  | Yes/No                                            |                                                                                                                                                                                                                                                                                                                                                                                                                |
| (visible only if "Yes") | Active principle                                  | <ul style="list-style-type: none"> <li>• Iobitridol</li> </ul>                                                                                                                                                                                                                                                                                                                                                 |

|                                                              |                        |                                                                                                                                               |
|--------------------------------------------------------------|------------------------|-----------------------------------------------------------------------------------------------------------------------------------------------|
|                                                              |                        | <ul style="list-style-type: none"> <li>• Iodixanol</li> <li>• Iohexol</li> <li>• Iomeprol</li> <li>• Iopromide</li> <li>• Ioversol</li> </ul> |
|                                                              | Commercial name        | [Free text]                                                                                                                                   |
|                                                              | Volume                 | [Numeric] (ml)                                                                                                                                |
|                                                              | Flow rate              | [Numeric] (ml/sec)                                                                                                                            |
|                                                              | Iodine concentration   | [Numeric] (mg I/ml)                                                                                                                           |
| ADVERSE EVENTS                                               |                        |                                                                                                                                               |
| <b>ONGOING adverse events</b><br><br>(visible only if “Yes”) | Yes/No                 |                                                                                                                                               |
|                                                              | Date and hour of event | [dd/mm/yyyy, hour]                                                                                                                            |
|                                                              | Degree                 | <ul style="list-style-type: none"> <li>• Mild</li> <li>• Moderate</li> <li>• Severe</li> </ul>                                                |
|                                                              | Time of onset          | <ul style="list-style-type: none"> <li>• Early</li> <li>• Late</li> </ul><br>Minutes [Numeric] (optional)                                     |

|  |      |                                                                                                                                                                                                                                                                                                                                                                                                                                                                                                                                                                                                                                                                 |
|--|------|-----------------------------------------------------------------------------------------------------------------------------------------------------------------------------------------------------------------------------------------------------------------------------------------------------------------------------------------------------------------------------------------------------------------------------------------------------------------------------------------------------------------------------------------------------------------------------------------------------------------------------------------------------------------|
|  | Type | <p>ALLERGIC / ALLERGIC-LIKE</p> <p><b>Mild</b></p> <ul style="list-style-type: none"><li>● Sparse wheals/itch</li><li>● Skin edema</li><li>● Mild itching / feeling like "velvet in the throat"</li><li>● Nasal congestion</li><li>● Sneezing</li><li>● Conjunctivitis</li><li>● Rhinorrhea</li></ul> <p><b>Moderate</b></p> <ul style="list-style-type: none"><li>● Diffuse wheals/intense itch</li><li>● Diffuse skin edema</li><li>● Facial edema without dyspnea</li><li>● Feeling of choking or hoarseness</li><li>● Wheezing / mild bronchospasm without hypoxia</li></ul> <p><b>Severe</b></p> <ul style="list-style-type: none"><li>● Dyspnea</li></ul> |
|--|------|-----------------------------------------------------------------------------------------------------------------------------------------------------------------------------------------------------------------------------------------------------------------------------------------------------------------------------------------------------------------------------------------------------------------------------------------------------------------------------------------------------------------------------------------------------------------------------------------------------------------------------------------------------------------|

|  |  |                                                                                                                                                                                                                                                                                                                                                                                                                                                                                                                                                                                                                                                                                                                                                                                             |
|--|--|---------------------------------------------------------------------------------------------------------------------------------------------------------------------------------------------------------------------------------------------------------------------------------------------------------------------------------------------------------------------------------------------------------------------------------------------------------------------------------------------------------------------------------------------------------------------------------------------------------------------------------------------------------------------------------------------------------------------------------------------------------------------------------------------|
|  |  | <ul style="list-style-type: none"><li>• Erythema – diffuse mucocutaneous symptoms</li><li>• Laryngeal edema with stridor and/or hypoxia</li><li>• Wheezing / bronchospasm</li><li>• Significant hypoxia</li><li>• Anaphylactic shock (severe hypotension and brady-tachyarrhythmia)</li></ul> <p>NON-ALLERGIC</p> <p><b>Mild</b></p> <ul style="list-style-type: none"><li>• Mild nausea/limited vomiting</li><li>• Transient chills / heat / redness</li><li>• Headache / dizziness / anxiety / altered taste</li><li>• Slight increase in blood pressure</li><li>• Self-limiting vasovagal reaction</li></ul> <p><b>Moderate</b></p> <ul style="list-style-type: none"><li>• Prolonged nausea/vomiting</li><li>• Elevated arterial blood pressure</li><li>• Isolated chest pain</li></ul> |
|--|--|---------------------------------------------------------------------------------------------------------------------------------------------------------------------------------------------------------------------------------------------------------------------------------------------------------------------------------------------------------------------------------------------------------------------------------------------------------------------------------------------------------------------------------------------------------------------------------------------------------------------------------------------------------------------------------------------------------------------------------------------------------------------------------------------|

|  |                   |                                                                                                                                                                                                                                                                                                                   |
|--|-------------------|-------------------------------------------------------------------------------------------------------------------------------------------------------------------------------------------------------------------------------------------------------------------------------------------------------------------|
|  |                   | <ul style="list-style-type: none"> <li>• Vasovagal reaction</li> </ul> <p><b>Severe</b></p> <ul style="list-style-type: none"> <li>• Treatment-refractory vasovagal reaction</li> <li>• Arrhythmia</li> <li>• Convulsions</li> <li>• Severe arterial hypertension</li> </ul> <p>CONTRAST MEDIUM EXTRAVASATION</p> |
|  | Type of treatment | <ul style="list-style-type: none"> <li>• Wait and see</li> <li>• Drug therapy (specify in “Notes” field)</li> <li>• Anesthesiologist’s intervention required</li> </ul>                                                                                                                                           |
|  | Event resolution  | <ul style="list-style-type: none"> <li>• Spontaneous</li> <li>• After treatment</li> <li>• After hospitalization</li> <li>• Other [<i>Free text</i>]</li> </ul>                                                                                                                                                   |

## REPORT

| FIELD         | DETAIL              | ADMITTED VALUES                                                                                                                                                                                                                                                                                                                                                                                                                                                               |
|---------------|---------------------|-------------------------------------------------------------------------------------------------------------------------------------------------------------------------------------------------------------------------------------------------------------------------------------------------------------------------------------------------------------------------------------------------------------------------------------------------------------------------------|
| DIAGNOSIS     |                     |                                                                                                                                                                                                                                                                                                                                                                                                                                                                               |
| PRIMARY TUMOR |                     |                                                                                                                                                                                                                                                                                                                                                                                                                                                                               |
| Lesion        | Detectable (yes/no) | <p>If no:</p> <p>Indirect signs:</p> <ul style="list-style-type: none"><li>• pancreatic atrophy</li><li>• displaced calcifications in patient with chronic calcific pancreatitis</li><li>• duct-to-parenchyma ratio greater than 0.34</li><li>• double duct sign</li><li>• vessel encasement</li><li>• vessel deformity</li><li>• superior mesenteric artery (SMA) to superior mesenteric vein (SMV) ratio greater than 1</li></ul> <p>If yes: Size (mm [<i>Numeric</i>])</p> |



|  |             |                                                                                                                                                                                                                                                                                                                                                                                              |
|--|-------------|----------------------------------------------------------------------------------------------------------------------------------------------------------------------------------------------------------------------------------------------------------------------------------------------------------------------------------------------------------------------------------------------|
|  | Structure   | <ul style="list-style-type: none"><li>• Solid</li><li>• Cystic</li><li>• Mixed (solid/cystic)</li><li>• Description <i>[Free text]</i></li></ul>                                                                                                                                                                                                                                             |
|  | Site        | <ul style="list-style-type: none"><li>• Head, with option to specify:<ul style="list-style-type: none"><li>• paraduodenal portion (i.e., right of gastroduodenal artery)</li><li>• paravascular portion (i.e., left of gastroduodenal artery)</li><li>• upper portion</li><li>• lower portion</li></ul></li><li>• Uncinate process</li><li>• Isthmus</li><li>• Body</li><li>• Tail</li></ul> |
|  | Vascularity | <ul style="list-style-type: none"><li>• Hypovascular</li><li>• Isovascular</li><li>• Hypervascular</li><li>• Delayed enhancement</li></ul>                                                                                                                                                                                                                                                   |

|          |                                                                                                                                      |                                                                                                                                        |
|----------|--------------------------------------------------------------------------------------------------------------------------------------|----------------------------------------------------------------------------------------------------------------------------------------|
| Arteries | Anatomy                                                                                                                              | <ul style="list-style-type: none"> <li>• Normal</li> <li>• Variant (<i>[Free text]</i>)</li> </ul>                                     |
|          | Superior mesenteric artery<br><br><i>(note: vessels are considered to be not infiltrated when they are surrounded by a fat ring)</i> | <ul style="list-style-type: none"> <li>• Not infiltrated</li> <li>• &lt;180°</li> <li>• &gt;180°</li> <li>• Atherosclerotic</li> </ul> |
|          | Celiac trunk<br><br><i>(note: vessels are considered to be not infiltrated when they are surrounded by a fat ring)</i>               | <ul style="list-style-type: none"> <li>• Not infiltrated</li> <li>• &lt;180°</li> <li>• &gt;180°</li> <li>• Atherosclerotic</li> </ul> |
|          | Hepatic artery<br><br><i>(note: vessels are considered to be not infiltrated when they are surrounded by a fat ring)</i>             | <ul style="list-style-type: none"> <li>• Not infiltrated</li> <li>• &lt;180°</li> <li>• &gt;180°</li> <li>• Atherosclerotic</li> </ul> |
|          | *Distance between celiac trunk and infiltrated hepatic artery >5mm                                                                   | Yes/No                                                                                                                                 |
| Veins    | Anatomy                                                                                                                              | <ul style="list-style-type: none"> <li>• Normal</li> <li>• Variant (<i>[Free text]</i>)</li> </ul>                                     |

|               |                                                                                                                                           |                                                                                                                                                                                                                                                                                        |
|---------------|-------------------------------------------------------------------------------------------------------------------------------------------|----------------------------------------------------------------------------------------------------------------------------------------------------------------------------------------------------------------------------------------------------------------------------------------|
|               | <p>Superior mesenteric vein</p> <p><i>(note: vessels are considered to be not infiltrated when they are surrounded by a fat ring)</i></p> | <ul style="list-style-type: none"> <li>• Not infiltrated</li> <li>• &lt;180°</li> <li>• &gt;180°</li> <li>• Thrombosis (neoplastic / non-neoplastic)</li> <li>• Longitudinal extent of infiltration &gt;20mm (yes/no)</li> <li>• Tumor involves first jejunal loop (yes/no)</li> </ul> |
|               | <p>Portal vein</p> <p><i>(note: vessels are considered to be not infiltrated when they are surrounded by a fat ring)</i></p>              | <ul style="list-style-type: none"> <li>• Not infiltrated</li> <li>• &lt;180°</li> <li>• &gt;180°</li> <li>• Thrombosis (neoplastic / non-neoplastic)</li> </ul>                                                                                                                        |
|               | <p>Splenic vein</p> <p><i>(note: vessels are considered to be not infiltrated when they are surrounded by a fat ring)</i></p>             | <ul style="list-style-type: none"> <li>• Not infiltrated</li> <li>• &lt;180°</li> <li>• &gt;180°</li> <li>• Thrombosis (neoplastic / non-neoplastic)</li> </ul>                                                                                                                        |
| Biliary ducts | Dilated                                                                                                                                   | Yes/No; if yes:                                                                                                                                                                                                                                                                        |

|                         |                         |                                                                                                                                                                                                                               |
|-------------------------|-------------------------|-------------------------------------------------------------------------------------------------------------------------------------------------------------------------------------------------------------------------------|
|                         |                         | <ul style="list-style-type: none"> <li>diameter of left-sided ducts (mm) <i>[Numeric]</i></li> <li>diameter of right-sided ducts (mm) <i>[Numeric]</i></li> <li>diameter of common bile duct (mm) <i>[Numeric]</i></li> </ul> |
| Posterior lamina        | Infiltration            | <ul style="list-style-type: none"> <li>Yes</li> <li>No</li> <li>Uncertain (<i>[Free text]</i>)</li> </ul>                                                                                                                     |
| Loco-regional diffusion | Stomach                 | Infiltration (yes/no)                                                                                                                                                                                                         |
|                         | Spleen                  | Infiltration (yes/no)                                                                                                                                                                                                         |
|                         | Duodenum                | Infiltration (yes/no)                                                                                                                                                                                                         |
|                         | Treitz                  | Infiltration (yes/no)                                                                                                                                                                                                         |
|                         | Common bile duct        | Infiltration (yes/no)                                                                                                                                                                                                         |
|                         | Liver                   | Infiltration (yes/no)                                                                                                                                                                                                         |
|                         | Other                   | <i>[Free text]</i>                                                                                                                                                                                                            |
| Notes                   | <i>[Free text]</i>      |                                                                                                                                                                                                                               |
| Peritoneal effusion     | Peripancreatic effusion | Yes/No                                                                                                                                                                                                                        |
|                         | Supramesocolic effusion | Yes/No                                                                                                                                                                                                                        |

|                           |                                                                                                        |                                                                                                                 |
|---------------------------|--------------------------------------------------------------------------------------------------------|-----------------------------------------------------------------------------------------------------------------|
|                           | Pelvic effusion                                                                                        | Yes/No                                                                                                          |
|                           | Supra- and submesocolic effusion                                                                       | Yes/No                                                                                                          |
| Peritoneal carcinomatosis | <ul style="list-style-type: none"> <li>• No</li> <li>• Yes (description <i>[Free text]</i>)</li> </ul> |                                                                                                                 |
| Omentum                   | Infiltration                                                                                           | <ul style="list-style-type: none"> <li>• Yes</li> <li>• No</li> <li>• Uncertain (<i>[Free text]</i>)</li> </ul> |

|                                  |                                                                                                                                                                                                  |
|----------------------------------|--------------------------------------------------------------------------------------------------------------------------------------------------------------------------------------------------|
| LOCO-REGIONAL LYMPHOADENOPATHIES | Yes/No; if yes: <ul style="list-style-type: none"> <li>• Peripancreatic</li> <li>• Celiac</li> <li>• Para-aortic</li> </ul> <i>(note: lymph nodes with long axis &gt;5mm should be reported)</i> |
| DISTANT METASTASES               | Yes/No                                                                                                                                                                                           |
| Liver                            | Yes/No; if yes:<br><br>Number of detectable lesions <i>[Numeric]</i><br><br>For each target lesion (up to 2): <ul style="list-style-type: none"> <li>• site <i>[Liver segment]</i></li> </ul>    |

|                           |                                                                                                                                                                                                                                                                                                                                                                                                                                           |
|---------------------------|-------------------------------------------------------------------------------------------------------------------------------------------------------------------------------------------------------------------------------------------------------------------------------------------------------------------------------------------------------------------------------------------------------------------------------------------|
|                           | <ul style="list-style-type: none"> <li>• maximum diameter on axial images (mm) <i>[Numeric]</i></li> <li>• diameter perpendicular to maximum diameter (mm) <i>[Numeric]</i></li> <li>• structure <i>[Free text]</i></li> </ul>                                                                                                                                                                                                            |
| Lung                      | <p>Yes/No; if yes:</p> <p>Number of detectable lesions <i>[Numeric]</i></p> <p>For each target lesion (up to 2):</p> <ul style="list-style-type: none"> <li>• site <i>[Lung lobe, Lung segment]</i></li> <li>• maximum diameter on axial images (mm) <i>[Numeric]</i></li> <li>• diameter perpendicular to maximum diameter (mm) <i>[Numeric]</i></li> </ul> <p>Lymphangitic carcinomatosis (yes/no; if yes, site <i>[Free text]</i>)</p> |
| Non-regional lymph nodes  | <p>Yes/No; if yes:</p> <ul style="list-style-type: none"> <li>• site <i>[Free text]</i></li> <li>• maximum diameter on axial images (mm) <i>[Numeric]</i></li> <li>• diameter perpendicular to maximum diameter (mm) <i>[Numeric]</i></li> </ul>                                                                                                                                                                                          |
| Other organs (incl. bone) | <ul style="list-style-type: none"> <li>• yes (site and type <i>[Free text]</i>)</li> <li>• no</li> </ul>                                                                                                                                                                                                                                                                                                                                  |

|                    |                                                                                                                                                                            |
|--------------------|----------------------------------------------------------------------------------------------------------------------------------------------------------------------------|
| Acute pancreatitis | <ul style="list-style-type: none"> <li>• No</li> <li>• Yes, ongoing (report findings <i>[Free text]</i>)</li> <li>• Yes, sequelae (pseudocysts <i>[Yes/no]</i>)</li> </ul> |
| Pulmonary embolism | <ul style="list-style-type: none"> <li>• No</li> <li>• Yes (site and extent <i>[Free text]</i>)</li> </ul>                                                                 |

| INCIDENTAL FINDINGS |                    |
|---------------------|--------------------|
| Brain               | <i>[Free text]</i> |
| Neck                | <i>[Free text]</i> |
| Chest               | <i>[Free text]</i> |
| Abdomen             | <i>[Free text]</i> |

|                                 |                    |
|---------------------------------|--------------------|
| CONCLUSIONS AND RECOMMENDATIONS | <i>[Free text]</i> |
|---------------------------------|--------------------|

## IMAGES

| FIELD | DETAIL | ADMITTED VALUES |
|-------|--------|-----------------|
|-------|--------|-----------------|

---

|            |            |                 |
|------------|------------|-----------------|
| Key images | Key images | <i>[Images]</i> |
|------------|------------|-----------------|



## Section S2

**PATIENT CLINICAL DATA** (*imported from RIS*)

| FIELD                                                                         | DETAIL                                                                                     | ADMITTED VALUES                                                                                                                                                                    |
|-------------------------------------------------------------------------------|--------------------------------------------------------------------------------------------|------------------------------------------------------------------------------------------------------------------------------------------------------------------------------------|
| ANTHROPOMETRIC DATA                                                           |                                                                                            |                                                                                                                                                                                    |
| Weight                                                                        | (kg) [Numeric]                                                                             |                                                                                                                                                                                    |
| Height                                                                        | (cm) [Numeric]                                                                             |                                                                                                                                                                                    |
| BMI                                                                           | [Numeric] (automatically calculated)                                                       |                                                                                                                                                                                    |
| BSA                                                                           | [Numeric] (automatically calculated)                                                       |                                                                                                                                                                                    |
| Age                                                                           | (years) [Numeric]                                                                          |                                                                                                                                                                                    |
| Age range<br>(filled in automatically)                                        | <ul style="list-style-type: none"> <li>• &lt; 50 years</li> <li>• &gt; 50 years</li> </ul> |                                                                                                                                                                                    |
| PATIENT HISTORY                                                               |                                                                                            |                                                                                                                                                                                    |
| Family history of pancreatic cancer<br>(visible only if "Yes" and repeatable) | Yes/No                                                                                     |                                                                                                                                                                                    |
|                                                                               | Degree of kinship                                                                          | <ul style="list-style-type: none"> <li>• Mother</li> <li>• Father</li> <li>• Brother(s)/sister(s)</li> <li>• Maternal grandparent(s)</li> <li>• Paternal grandparent(s)</li> </ul> |

|                                                                 |        |                                                                                                                                                                                                                                                                   |
|-----------------------------------------------------------------|--------|-------------------------------------------------------------------------------------------------------------------------------------------------------------------------------------------------------------------------------------------------------------------|
|                                                                 |        | <ul style="list-style-type: none"> <li>• Uncle(s)/aunt(s)</li> <li>• Other <i>[Free text]</i></li> </ul>                                                                                                                                                          |
|                                                                 | Notes  | <i>[Free text]</i>                                                                                                                                                                                                                                                |
| Personal history of other cancers                               | Yes/No |                                                                                                                                                                                                                                                                   |
|                                                                 | Notes  | <i>[Free text]</i>                                                                                                                                                                                                                                                |
| Predisposing diseases<br>(visible only if “Yes” and repeatable) | Yes/No |                                                                                                                                                                                                                                                                   |
|                                                                 | Type   | <ul style="list-style-type: none"> <li>• Obesity</li> <li>• Diabetes mellitus</li> <li>• Chronic pancreatitis</li> <li>• Prior gastrectomy</li> </ul>                                                                                                             |
|                                                                 | Notes  | <i>[Free text]</i>                                                                                                                                                                                                                                                |
| Hereditary syndromes<br>(visible only if “Yes” and repeatable)  | Type   | <ul style="list-style-type: none"> <li>• Peutz-Jeghers syndrome</li> <li>• familial atypical multiple mole melanoma (FAMMM) syndrome</li> <li>• hereditary pancreatitis</li> <li>• autoimmune syndromes (pancreatitis, etc.)</li> <li>• Lynch syndrome</li> </ul> |

|                                        |                                                 |                                                                                                                                                                                                      |                                                                                         |
|----------------------------------------|-------------------------------------------------|------------------------------------------------------------------------------------------------------------------------------------------------------------------------------------------------------|-----------------------------------------------------------------------------------------|
|                                        |                                                 | <ul style="list-style-type: none"> <li>hereditary nonpolyposis colorectal cancer (HNPCC)</li> <li>familial breast cancer</li> <li>ataxia-telangiectasia</li> <li>other <i>[Free text]</i></li> </ul> |                                                                                         |
| Other genetic mutations                | Yes/No                                          | <ul style="list-style-type: none"> <li>BRCA-2</li> <li>other <i>[Free text]</i></li> </ul>                                                                                                           |                                                                                         |
| Lifestyle/dietary habits               | Smoke                                           | Yes/No                                                                                                                                                                                               |                                                                                         |
| (visible only if “Yes” and repeatable) | SMOKING DETAILS (visible only if Smoke = “Yes”) |                                                                                                                                                                                                      |                                                                                         |
|                                        |                                                 | Smoker                                                                                                                                                                                               | <ul style="list-style-type: none"> <li>Current smoker</li> <li>Former smoker</li> </ul> |
|                                        |                                                 | Cigarette smoke                                                                                                                                                                                      | Yes/No                                                                                  |
|                                        |                                                 | Number of daily cigarettes (if “Current smoker”)                                                                                                                                                     | <i>[Numeric]</i>                                                                        |
|                                        |                                                 | Smoking years                                                                                                                                                                                        | <i>[Numeric]</i>                                                                        |
|                                        |                                                 | Years from cessation (if “Former smoker”)                                                                                                                                                            | <ul style="list-style-type: none"> <li>≤15</li> <li>&gt;15</li> </ul>                   |
|                                        |                                                 | Cigarettes per year (pack-year)                                                                                                                                                                      | <i>[Numeric]</i> (automatically calculated)*                                            |

|  |                        |                                                                           |                                                    |
|--|------------------------|---------------------------------------------------------------------------|----------------------------------------------------|
|  |                        | (if “Former smoker” or “Current smoker”)                                  | *(Number of daily cigarettes x smoking years / 20) |
|  |                        | Vaping                                                                    | Yes/No                                             |
|  |                        | Number of daily electronic cigarettes refills (if vaping = “Yes”)         | [Numeric]                                          |
|  |                        | Number of years (if vaping = “Yes”)                                       | [Numeric]                                          |
|  |                        | Notes                                                                     | [Free text]                                        |
|  | High alcohol intake    | Yes (more than 1 glass/day for women and 2 glasses/day for men)<br><br>No |                                                    |
|  | High meat intake       | Yes (white or red meat intake more than 3 times/week)<br><br>No           |                                                    |
|  | High cured meat intake | Yes (cured meat intake more than once a week)<br><br>No                   |                                                    |
|  | Low vegetable intake   | Yes (less than 2 servings/day)<br><br>No                                  |                                                    |
|  | Low fruit intake       | Yes (less than 3 whole fruits/day)<br><br>No                              |                                                    |
|  | Notes                  | [Free text]                                                               |                                                    |

| ALLERGIES AND ADVERSE REACTIONS                                                 |                                                                            |                                                                                                                                                                  |
|---------------------------------------------------------------------------------|----------------------------------------------------------------------------|------------------------------------------------------------------------------------------------------------------------------------------------------------------|
| <b>Reported allergies</b><br><br>(visible only if “Yes” and repeatable)         | Yes/No                                                                     |                                                                                                                                                                  |
|                                                                                 | Type                                                                       | <ul style="list-style-type: none"> <li>• Drug-related (n of drugs)</li> <li>• Contrast medium-related (n of contrast media)</li> <li>• Drug-unrelated</li> </ul> |
|                                                                                 | Active principle/molecule<br>[if drug- or contrast medium-related allergy] | [Free text]                                                                                                                                                      |
|                                                                                 | Commercial name<br>[if drug- or contrast medium-related allergy]           | [Free text]                                                                                                                                                      |
|                                                                                 | Notes                                                                      | [Free text]                                                                                                                                                      |
| <b>PREVIOUS adverse reactions</b><br><br>(visible only if “Yes” and repeatable) | Yes/No                                                                     |                                                                                                                                                                  |
|                                                                                 | Date                                                                       | month/year [mm/yyyy]                                                                                                                                             |
|                                                                                 | Type                                                                       | <ul style="list-style-type: none"> <li>• Contrast medium-related / unrelated</li> </ul>                                                                          |
|                                                                                 | Degree                                                                     | <ul style="list-style-type: none"> <li>• Mild</li> <li>• Moderate</li> <li>• Severe</li> </ul>                                                                   |

|                            |                                  |                                                                                                                                                                                                                    |
|----------------------------|----------------------------------|--------------------------------------------------------------------------------------------------------------------------------------------------------------------------------------------------------------------|
|                            | Time of onset                    | <ul style="list-style-type: none"> <li>• Early</li> <li>• Late</li> </ul>                                                                                                                                          |
|                            | Notes                            | [Free text]                                                                                                                                                                                                        |
| Antiallergic premedication | Yes/No                           |                                                                                                                                                                                                                    |
|                            | Treatment                        | <ul style="list-style-type: none"> <li>• Steroid</li> <li>• Antihistamine</li> </ul>                                                                                                                               |
|                            | Complete                         | Yes/No                                                                                                                                                                                                             |
|                            | Notes                            | [Free text]                                                                                                                                                                                                        |
| Nephroprotective protocol  | Yes/No                           |                                                                                                                                                                                                                    |
|                            | Complete                         | Yes/No                                                                                                                                                                                                             |
|                            | Serum creatinine                 | [Numeric] (mg/dl)                                                                                                                                                                                                  |
|                            | GFR (Glomerular Filtration Rate) | [Numeric] (ml/min)<br><br><a href="https://www.merckmanuals.com/medical-calculators/GFR_CKD_EPI-it.htm">https://www.merckmanuals.com/medical-calculators/GFR_CKD_EPI-it.htm</a> (sex, race, age, serum creatinine) |
|                            | Notes                            | [Free text]                                                                                                                                                                                                        |

## CLINICAL EVALUATION

| FIELD                                                         | DETAIL                                                               | ADMITTED VALUES                                                                                                                                                                                                                                                                      |
|---------------------------------------------------------------|----------------------------------------------------------------------|--------------------------------------------------------------------------------------------------------------------------------------------------------------------------------------------------------------------------------------------------------------------------------------|
| CLINICAL INFORMATION                                          | Yes/No                                                               |                                                                                                                                                                                                                                                                                      |
| Prior imaging tests<br>(visible only if “Yes” and repeatable) | Type                                                                 | <ul style="list-style-type: none"> <li>• Gastroscopy</li> <li>• Endoscopic ultrasonography</li> <li>• CT</li> <li>• MRI</li> <li>• Ultrasonography</li> <li>• CEUS</li> <li>• <sup>18</sup>F-FDG PET-CT</li> <li>• <sup>68</sup>Ga-SA PET-CT</li> <li>• Other [Free text]</li> </ul> |
|                                                               | Date                                                                 | [dd/mm/yyyy]                                                                                                                                                                                                                                                                         |
|                                                               | Notes                                                                | [Free text]                                                                                                                                                                                                                                                                          |
| Histopathological examination on biopsy specimen              | Yes/No                                                               |                                                                                                                                                                                                                                                                                      |
| Histologic grade                                              | <ul style="list-style-type: none"> <li>• Gx</li> <li>• G1</li> </ul> |                                                                                                                                                                                                                                                                                      |

|                 |                                                                                                                                                                                                                                                                                                                                                                                                                                                                                                                                                                                                                                                                                                                                                                                                                                 |
|-----------------|---------------------------------------------------------------------------------------------------------------------------------------------------------------------------------------------------------------------------------------------------------------------------------------------------------------------------------------------------------------------------------------------------------------------------------------------------------------------------------------------------------------------------------------------------------------------------------------------------------------------------------------------------------------------------------------------------------------------------------------------------------------------------------------------------------------------------------|
|                 | <ul style="list-style-type: none"> <li>• G2</li> <li>• G3</li> </ul>                                                                                                                                                                                                                                                                                                                                                                                                                                                                                                                                                                                                                                                                                                                                                            |
| Histologic type | <ul style="list-style-type: none"> <li>• Ductal adenocarcinoma</li> <li>• Adenosquamous carcinoma</li> <li>• Hepatoid carcinoma</li> <li>• Medullary carcinoma</li> <li>• Mucinous noncystic carcinoma (colloid carcinoma)</li> <li>• Signet ring cell carcinoma</li> <li>• Undifferentiated carcinoma</li> <li>• Undifferentiated carcinoma with osteoclast-like giant cells</li> <li>• Acinar cell carcinoma</li> <li>• Acinar cell cystadenocarcinoma</li> <li>• Intraductal papillary mucinous neoplasm with associated invasive carcinoma</li> <li>• Intraductal tubulopapillary neoplasm with associated invasive carcinoma</li> <li>• Mucinous cystic neoplasm with associated invasive carcinoma</li> <li>• Pancreatoblastoma</li> <li>• Serous cystadenocarcinoma</li> <li>• Solid pseudopapillary neoplasm</li> </ul> |



|                  |                                                                                                                                                                                                                                                                                                                                                                               |                                                                                                                                                                  |
|------------------|-------------------------------------------------------------------------------------------------------------------------------------------------------------------------------------------------------------------------------------------------------------------------------------------------------------------------------------------------------------------------------|------------------------------------------------------------------------------------------------------------------------------------------------------------------|
|                  | <ul style="list-style-type: none"> <li>• Neuroendocrine carcinoma</li> <li>• Small cell neuroendocrine carcinoma</li> <li>• Large cell neuroendocrine carcinoma</li> <li>• Mixed acinar ductal carcinoma</li> <li>• Mixed acinar neuroendocrine carcinoma</li> <li>• Mixed acinar neuroendocrine ductal carcinoma</li> <li>• Mixed neuroendocrine ductal carcinoma</li> </ul> |                                                                                                                                                                  |
| Ca19.9 level     | [Numeric]                                                                                                                                                                                                                                                                                                                                                                     |                                                                                                                                                                  |
| CEA level        | [Numeric]                                                                                                                                                                                                                                                                                                                                                                     |                                                                                                                                                                  |
| Blood count      | [Numeric]                                                                                                                                                                                                                                                                                                                                                                     |                                                                                                                                                                  |
| Serum creatinine | [Numeric]                                                                                                                                                                                                                                                                                                                                                                     |                                                                                                                                                                  |
| Liver function   | <ul style="list-style-type: none"> <li>• Normal</li> <li>• Impaired</li> </ul>                                                                                                                                                                                                                                                                                                |                                                                                                                                                                  |
| Symptoms         | Yes/No                                                                                                                                                                                                                                                                                                                                                                        | If yes: <ul style="list-style-type: none"> <li>• pain (yes/no)</li> <li>• jaundice (yes/no)</li> <li>• diarrhea (yes/no)</li> <li>• other [Free text]</li> </ul> |

## IMAGING PROTOCOL

| FIELD                   | DETAIL                                                      | ADMITTED VALUES                                                                                                                                                                                                                                                                            |
|-------------------------|-------------------------------------------------------------|--------------------------------------------------------------------------------------------------------------------------------------------------------------------------------------------------------------------------------------------------------------------------------------------|
| IMAGING DATA            |                                                             |                                                                                                                                                                                                                                                                                            |
| Date of examination     | Date <i>[dd/mm/yyyy]</i>                                    |                                                                                                                                                                                                                                                                                            |
| Clinical indication     | Primary staging                                             |                                                                                                                                                                                                                                                                                            |
| Scanner brand and model | <i>[Free text]</i>                                          |                                                                                                                                                                                                                                                                                            |
| CT protocol             | Number of detector rows                                     | <i>[Numeric]</i>                                                                                                                                                                                                                                                                           |
|                         | Precontrast scan<br><i>(*details visible only if "Yes")</i> | *Yes/No<br><br>Dual energy (Yes/No)<br><br>Slice thickness (mm) <i>[Numeric]</i><br><br>Convolution kernel(s) <i>[Free text]</i><br><br>Body area <i>[multiple choice]</i> : <ul style="list-style-type: none"> <li>• abdomen</li> <li>• chest</li> <li>• neck</li> <li>• brain</li> </ul> |
|                         | Post-contrast scan                                          | <i>*[Numeric]</i>                                                                                                                                                                                                                                                                          |

|                         |                                                   |                                                                                                                                                                                                                                                                                                                                                                                                                |
|-------------------------|---------------------------------------------------|----------------------------------------------------------------------------------------------------------------------------------------------------------------------------------------------------------------------------------------------------------------------------------------------------------------------------------------------------------------------------------------------------------------|
|                         | (*details repeatable for each post-contrast scan) | Post-contrast phase(s) [multiple choice]: <ul style="list-style-type: none"> <li>• early arterial</li> <li>• pancreatic</li> <li>• venous</li> <li>• late</li> </ul> Dual energy (Yes/No)<br>Slice thickness (mm) [Numeric]<br>Convolution kernel(s) [Free text]<br>Body area [multiple choice]: <ul style="list-style-type: none"> <li>• abdomen</li> <li>• chest</li> <li>• neck</li> <li>• brain</li> </ul> |
| Radiation exposure      | Class of radiation exposure                       | [Numeric]                                                                                                                                                                                                                                                                                                                                                                                                      |
| CONTRAST MEDIUM         |                                                   |                                                                                                                                                                                                                                                                                                                                                                                                                |
| Use of contrast medium  | Yes/No                                            |                                                                                                                                                                                                                                                                                                                                                                                                                |
| (visible only if "Yes") | Active principle                                  | <ul style="list-style-type: none"> <li>• Iobitridol</li> </ul>                                                                                                                                                                                                                                                                                                                                                 |

|                                                              |                        |                                                                                                                                               |
|--------------------------------------------------------------|------------------------|-----------------------------------------------------------------------------------------------------------------------------------------------|
|                                                              |                        | <ul style="list-style-type: none"> <li>• Iodixanol</li> <li>• Iohexol</li> <li>• Iomeprol</li> <li>• Iopromide</li> <li>• Ioversol</li> </ul> |
|                                                              | Commercial name        | [Free text]                                                                                                                                   |
|                                                              | Volume                 | [Numeric] (ml)                                                                                                                                |
|                                                              | Flow rate              | [Numeric] (ml/sec)                                                                                                                            |
|                                                              | Iodine concentration   | [Numeric] (mg I/ml)                                                                                                                           |
| ADVERSE EVENTS                                               |                        |                                                                                                                                               |
| <b>ONGOING adverse events</b><br><br>(visible only if “Yes”) | Yes/No                 |                                                                                                                                               |
|                                                              | Date and hour of event | [dd/mm/yyyy, hour]                                                                                                                            |
|                                                              | Degree                 | <ul style="list-style-type: none"> <li>• Mild</li> <li>• Moderate</li> <li>• Severe</li> </ul>                                                |
|                                                              | Time of onset          | <ul style="list-style-type: none"> <li>• Early</li> <li>• Late</li> </ul><br>Minutes [Numeric] (optional)                                     |

|  |      |                                                                                                                                                                                                                                                                                                                                                                                                                                                                                                                                                                                                                                                                 |
|--|------|-----------------------------------------------------------------------------------------------------------------------------------------------------------------------------------------------------------------------------------------------------------------------------------------------------------------------------------------------------------------------------------------------------------------------------------------------------------------------------------------------------------------------------------------------------------------------------------------------------------------------------------------------------------------|
|  | Type | <p>ALLERGIC / ALLERGIC-LIKE</p> <p><b>Mild</b></p> <ul style="list-style-type: none"><li>• Sparse wheals/itch</li><li>• Skin edema</li><li>• Mild itching / feeling like "velvet in the throat"</li><li>• Nasal congestion</li><li>• Sneezing</li><li>• Conjunctivitis</li><li>• Rhinorrhea</li></ul> <p><b>Moderate</b></p> <ul style="list-style-type: none"><li>• Diffuse wheals/intense itch</li><li>• Diffuse skin edema</li><li>• Facial edema without dyspnea</li><li>• Feeling of choking or hoarseness</li><li>• Wheezing / mild bronchospasm without hypoxia</li></ul> <p><b>Severe</b></p> <ul style="list-style-type: none"><li>• Dyspnea</li></ul> |
|--|------|-----------------------------------------------------------------------------------------------------------------------------------------------------------------------------------------------------------------------------------------------------------------------------------------------------------------------------------------------------------------------------------------------------------------------------------------------------------------------------------------------------------------------------------------------------------------------------------------------------------------------------------------------------------------|

|  |  |                                                                                                                                                                                                                                                                                                                                                                                                                                                                                                                                                                                                                                                                                                                                                                                             |
|--|--|---------------------------------------------------------------------------------------------------------------------------------------------------------------------------------------------------------------------------------------------------------------------------------------------------------------------------------------------------------------------------------------------------------------------------------------------------------------------------------------------------------------------------------------------------------------------------------------------------------------------------------------------------------------------------------------------------------------------------------------------------------------------------------------------|
|  |  | <ul style="list-style-type: none"><li>• Erythema – diffuse mucocutaneous symptoms</li><li>• Laryngeal edema with stridor and/or hypoxia</li><li>• Wheezing / bronchospasm</li><li>• Significant hypoxia</li><li>• Anaphylactic shock (severe hypotension and brady-tachyarrhythmia)</li></ul> <p>NON-ALLERGIC</p> <p><b>Mild</b></p> <ul style="list-style-type: none"><li>• Mild nausea/limited vomiting</li><li>• Transient chills / heat / redness</li><li>• Headache / dizziness / anxiety / altered taste</li><li>• Slight increase in blood pressure</li><li>• Self-limiting vasovagal reaction</li></ul> <p><b>Moderate</b></p> <ul style="list-style-type: none"><li>• Prolonged nausea/vomiting</li><li>• Elevated arterial blood pressure</li><li>• Isolated chest pain</li></ul> |
|--|--|---------------------------------------------------------------------------------------------------------------------------------------------------------------------------------------------------------------------------------------------------------------------------------------------------------------------------------------------------------------------------------------------------------------------------------------------------------------------------------------------------------------------------------------------------------------------------------------------------------------------------------------------------------------------------------------------------------------------------------------------------------------------------------------------|

|  |                   |                                                                                                                                                                                                                                                                                                                   |
|--|-------------------|-------------------------------------------------------------------------------------------------------------------------------------------------------------------------------------------------------------------------------------------------------------------------------------------------------------------|
|  |                   | <ul style="list-style-type: none"> <li>• Vasovagal reaction</li> </ul> <p><b>Severe</b></p> <ul style="list-style-type: none"> <li>• Treatment-refractory vasovagal reaction</li> <li>• Arrhythmia</li> <li>• Convulsions</li> <li>• Severe arterial hypertension</li> </ul> <p>CONTRAST MEDIUM EXTRAVASATION</p> |
|  | Type of treatment | <ul style="list-style-type: none"> <li>• Wait and see</li> <li>• Drug therapy (specify in “Notes” field)</li> <li>• Anesthesiologist’s intervention required</li> </ul>                                                                                                                                           |
|  | Event resolution  | <ul style="list-style-type: none"> <li>• Spontaneous</li> <li>• After treatment</li> <li>• After hospitalization</li> <li>• Other [<i>Free text</i>]</li> </ul>                                                                                                                                                   |

## REPORT

| FIELD         | DETAIL              | ADMITTED VALUES                                                                                                                                                                                                                                                                                                                                                                                                                                                               |
|---------------|---------------------|-------------------------------------------------------------------------------------------------------------------------------------------------------------------------------------------------------------------------------------------------------------------------------------------------------------------------------------------------------------------------------------------------------------------------------------------------------------------------------|
| DIAGNOSIS     |                     |                                                                                                                                                                                                                                                                                                                                                                                                                                                                               |
| PRIMARY TUMOR |                     |                                                                                                                                                                                                                                                                                                                                                                                                                                                                               |
| Lesion        | Detectable (yes/no) | <p>If no:</p> <p>Indirect signs:</p> <ul style="list-style-type: none"><li>• pancreatic atrophy</li><li>• displaced calcifications in patient with chronic calcific pancreatitis</li><li>• duct-to-parenchyma ratio greater than 0.34</li><li>• double duct sign</li><li>• vessel encasement</li><li>• vessel deformity</li><li>• superior mesenteric artery (SMA) to superior mesenteric vein (SMV) ratio greater than 1</li></ul> <p>If yes: Size (mm [<i>Numeric</i>])</p> |



|  |             |                                                                                                                                                                                                                                                                                                                                                                                                           |
|--|-------------|-----------------------------------------------------------------------------------------------------------------------------------------------------------------------------------------------------------------------------------------------------------------------------------------------------------------------------------------------------------------------------------------------------------|
|  | Structure   | <ul style="list-style-type: none"> <li>• Solid</li> <li>• Cystic</li> <li>• Mixed (solid/cystic)</li> <li>• Description <i>[Free text]</i></li> </ul>                                                                                                                                                                                                                                                     |
|  | Site        | <ul style="list-style-type: none"> <li>• Head, with option to specify: <ul style="list-style-type: none"> <li>• paraduodenal portion (i.e., right of gastroduodenal artery)</li> <li>• paravascular portion (i.e., left of gastroduodenal artery)</li> <li>• upper portion</li> <li>• lower portion</li> </ul> </li> <li>• Uncinate process</li> <li>• Isthmus</li> <li>• Body</li> <li>• Tail</li> </ul> |
|  | Vascularity | <ul style="list-style-type: none"> <li>• Hypovascular</li> <li>• Isovascular</li> <li>• Hypervascular</li> <li>• Delayed enhancement</li> </ul>                                                                                                                                                                                                                                                           |

|          |                                                                                                                                      |                                                                                                                                        |
|----------|--------------------------------------------------------------------------------------------------------------------------------------|----------------------------------------------------------------------------------------------------------------------------------------|
| Arteries | Anatomy                                                                                                                              | <ul style="list-style-type: none"> <li>• Normal</li> <li>• Variant (<i>[Free text]</i>)</li> </ul>                                     |
|          | Superior mesenteric artery<br><br><i>(note: vessels are considered to be not infiltrated when they are surrounded by a fat ring)</i> | <ul style="list-style-type: none"> <li>• Not infiltrated</li> <li>• &lt;180°</li> <li>• &gt;180°</li> <li>• Atherosclerotic</li> </ul> |
|          | Celiac trunk<br><br><i>(note: vessels are considered to be not infiltrated when they are surrounded by a fat ring)</i>               | <ul style="list-style-type: none"> <li>• Not infiltrated</li> <li>• &lt;180°</li> <li>• &gt;180°</li> <li>• Atherosclerotic</li> </ul> |
|          | Hepatic artery<br><br><i>(note: vessels are considered to be not infiltrated when they are surrounded by a fat ring)</i>             | <ul style="list-style-type: none"> <li>• Not infiltrated</li> <li>• &lt;180°</li> <li>• &gt;180°</li> <li>• Atherosclerotic</li> </ul> |
|          | *Distance between celiac trunk and infiltrated hepatic artery >5mm                                                                   | Yes/No                                                                                                                                 |
| Veins    | Anatomy                                                                                                                              | <ul style="list-style-type: none"> <li>• Normal</li> <li>• Variant (<i>[Free text]</i>)</li> </ul>                                     |

|               |                                                                                                                                           |                                                                                                                                                                                                                                                                                        |
|---------------|-------------------------------------------------------------------------------------------------------------------------------------------|----------------------------------------------------------------------------------------------------------------------------------------------------------------------------------------------------------------------------------------------------------------------------------------|
|               | <p>Superior mesenteric vein</p> <p><i>(note: vessels are considered to be not infiltrated when they are surrounded by a fat ring)</i></p> | <ul style="list-style-type: none"> <li>• Not infiltrated</li> <li>• &lt;180°</li> <li>• &gt;180°</li> <li>• Thrombosis (neoplastic / non-neoplastic)</li> <li>• Longitudinal extent of infiltration &gt;20mm (yes/no)</li> <li>• Tumor involves first jejunal loop (yes/no)</li> </ul> |
|               | <p>Portal vein</p> <p><i>(note: vessels are considered to be not infiltrated when they are surrounded by a fat ring)</i></p>              | <ul style="list-style-type: none"> <li>• Not infiltrated</li> <li>• &lt;180°</li> <li>• &gt;180°</li> <li>• Thrombosis (neoplastic / non-neoplastic)</li> </ul>                                                                                                                        |
|               | <p>Splenic vein</p> <p><i>(note: vessels are considered to be not infiltrated when they are surrounded by a fat ring)</i></p>             | <ul style="list-style-type: none"> <li>• Not infiltrated</li> <li>• &lt;180°</li> <li>• &gt;180°</li> <li>• Thrombosis (neoplastic / non-neoplastic)</li> </ul>                                                                                                                        |
| Biliary ducts | Dilated                                                                                                                                   | Yes/No; if yes:                                                                                                                                                                                                                                                                        |

|                         |                         |                                                                                                                                                                                                                               |
|-------------------------|-------------------------|-------------------------------------------------------------------------------------------------------------------------------------------------------------------------------------------------------------------------------|
|                         |                         | <ul style="list-style-type: none"> <li>diameter of left-sided ducts (mm) <i>[Numeric]</i></li> <li>diameter of right-sided ducts (mm) <i>[Numeric]</i></li> <li>diameter of common bile duct (mm) <i>[Numeric]</i></li> </ul> |
| Posterior lamina        | Infiltration            | <ul style="list-style-type: none"> <li>Yes</li> <li>No</li> <li>Uncertain (<i>[Free text]</i>)</li> </ul>                                                                                                                     |
| Loco-regional diffusion | Stomach                 | Infiltration (yes/no)                                                                                                                                                                                                         |
|                         | Spleen                  | Infiltration (yes/no)                                                                                                                                                                                                         |
|                         | Duodenum                | Infiltration (yes/no)                                                                                                                                                                                                         |
|                         | Treitz                  | Infiltration (yes/no)                                                                                                                                                                                                         |
|                         | Common bile duct        | Infiltration (yes/no)                                                                                                                                                                                                         |
|                         | Liver                   | Infiltration (yes/no)                                                                                                                                                                                                         |
|                         | Other                   | <i>[Free text]</i>                                                                                                                                                                                                            |
| Notes                   | <i>[Free text]</i>      |                                                                                                                                                                                                                               |
| Peritoneal effusion     | Peripancreatic effusion | Yes/No                                                                                                                                                                                                                        |
|                         | Supramesocolic effusion | Yes/No                                                                                                                                                                                                                        |

|                           |                                                                                                        |                                                                                                                 |
|---------------------------|--------------------------------------------------------------------------------------------------------|-----------------------------------------------------------------------------------------------------------------|
|                           | Pelvic effusion                                                                                        | Yes/No                                                                                                          |
|                           | Supra- and submesocolic effusion                                                                       | Yes/No                                                                                                          |
| Peritoneal carcinomatosis | <ul style="list-style-type: none"> <li>• No</li> <li>• Yes (description <i>[Free text]</i>)</li> </ul> |                                                                                                                 |
| Omentum                   | Infiltration                                                                                           | <ul style="list-style-type: none"> <li>• Yes</li> <li>• No</li> <li>• Uncertain (<i>[Free text]</i>)</li> </ul> |

|                                  |                                                                                                                                                                                                  |
|----------------------------------|--------------------------------------------------------------------------------------------------------------------------------------------------------------------------------------------------|
| LOCO-REGIONAL LYMPHOADENOPATHIES | Yes/No; if yes: <ul style="list-style-type: none"> <li>• Peripancreatic</li> <li>• Celiac</li> <li>• Para-aortic</li> </ul> <i>(note: lymph nodes with long axis &gt;5mm should be reported)</i> |
| DISTANT METASTASES               | Yes/No                                                                                                                                                                                           |
| Liver                            | Yes/No; if yes:<br><br>Number of detectable lesions <i>[Numeric]</i><br><br>For each target lesion (up to 2): <ul style="list-style-type: none"> <li>• site <i>[Liver segment]</i></li> </ul>    |

|                           |                                                                                                                                                                                                                                                                                                                                                                                                                                           |
|---------------------------|-------------------------------------------------------------------------------------------------------------------------------------------------------------------------------------------------------------------------------------------------------------------------------------------------------------------------------------------------------------------------------------------------------------------------------------------|
|                           | <ul style="list-style-type: none"> <li>• maximum diameter on axial images (mm) <i>[Numeric]</i></li> <li>• diameter perpendicular to maximum diameter (mm) <i>[Numeric]</i></li> <li>• structure <i>[Free text]</i></li> </ul>                                                                                                                                                                                                            |
| Lung                      | <p>Yes/No; if yes:</p> <p>Number of detectable lesions <i>[Numeric]</i></p> <p>For each target lesion (up to 2):</p> <ul style="list-style-type: none"> <li>• site <i>[Lung lobe, Lung segment]</i></li> <li>• maximum diameter on axial images (mm) <i>[Numeric]</i></li> <li>• diameter perpendicular to maximum diameter (mm) <i>[Numeric]</i></li> </ul> <p>Lymphangitic carcinomatosis (yes/no; if yes, site <i>[Free text]</i>)</p> |
| Non-regional lymph nodes  | <p>Yes/No; if yes:</p> <ul style="list-style-type: none"> <li>• site <i>[Free text]</i></li> <li>• maximum diameter on axial images (mm) <i>[Numeric]</i></li> <li>• diameter perpendicular to maximum diameter (mm) <i>[Numeric]</i></li> </ul>                                                                                                                                                                                          |
| Other organs (incl. bone) | <ul style="list-style-type: none"> <li>• yes (site and type <i>[Free text]</i>)</li> <li>• no</li> </ul>                                                                                                                                                                                                                                                                                                                                  |

|                    |                                                                                                                                                                            |
|--------------------|----------------------------------------------------------------------------------------------------------------------------------------------------------------------------|
| Acute pancreatitis | <ul style="list-style-type: none"> <li>• No</li> <li>• Yes, ongoing (report findings <i>[Free text]</i>)</li> <li>• Yes, sequelae (pseudocysts <i>[Yes/no]</i>)</li> </ul> |
| Pulmonary embolism | <ul style="list-style-type: none"> <li>• No</li> <li>• Yes (site and extent <i>[Free text]</i>)</li> </ul>                                                                 |

| INCIDENTAL FINDINGS |                    |
|---------------------|--------------------|
| Brain               | <i>[Free text]</i> |
| Neck                | <i>[Free text]</i> |
| Chest               | <i>[Free text]</i> |
| Abdomen             | <i>[Free text]</i> |

|                                 |                    |
|---------------------------------|--------------------|
| CONCLUSIONS AND RECOMMENDATIONS | <i>[Free text]</i> |
|---------------------------------|--------------------|

## IMAGES

| FIELD | DETAIL | ADMITTED VALUES |
|-------|--------|-----------------|
|-------|--------|-----------------|

---

|            |            |                 |
|------------|------------|-----------------|
| Key images | Key images | <i>[Images]</i> |
|------------|------------|-----------------|
